# Supplementary material for: TimeDelay-ARACNE: Reverse engineering of gene networks from time-course data by an information theoretic approach
Source: Springer Nature journal article supplement (doi:10.1186/1471-2105-11-154), 2010-03-25

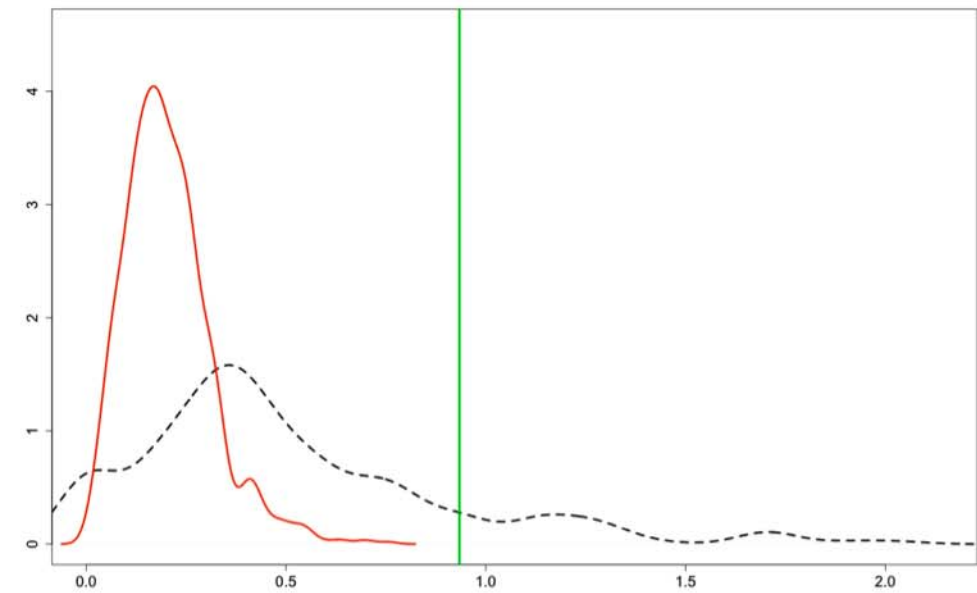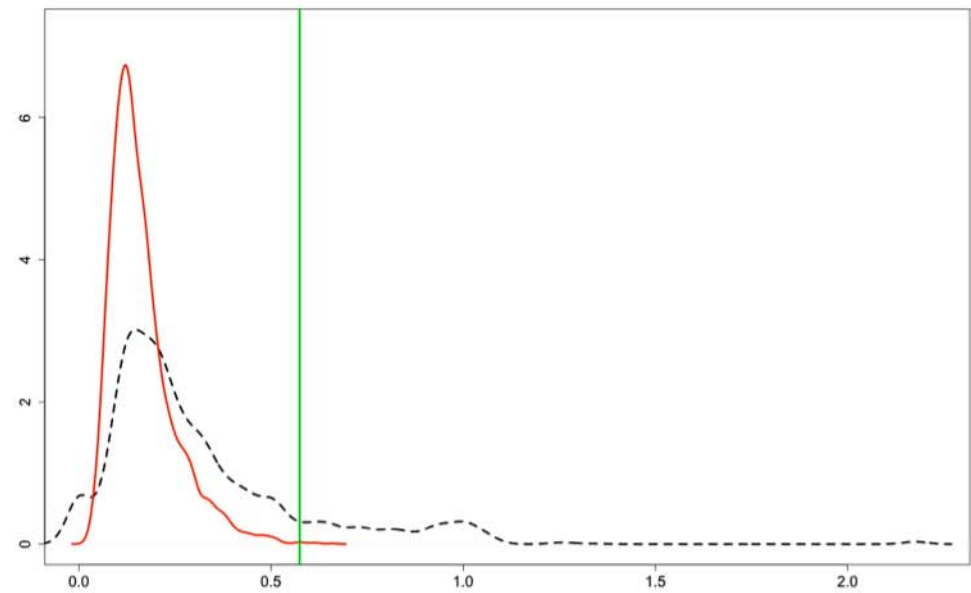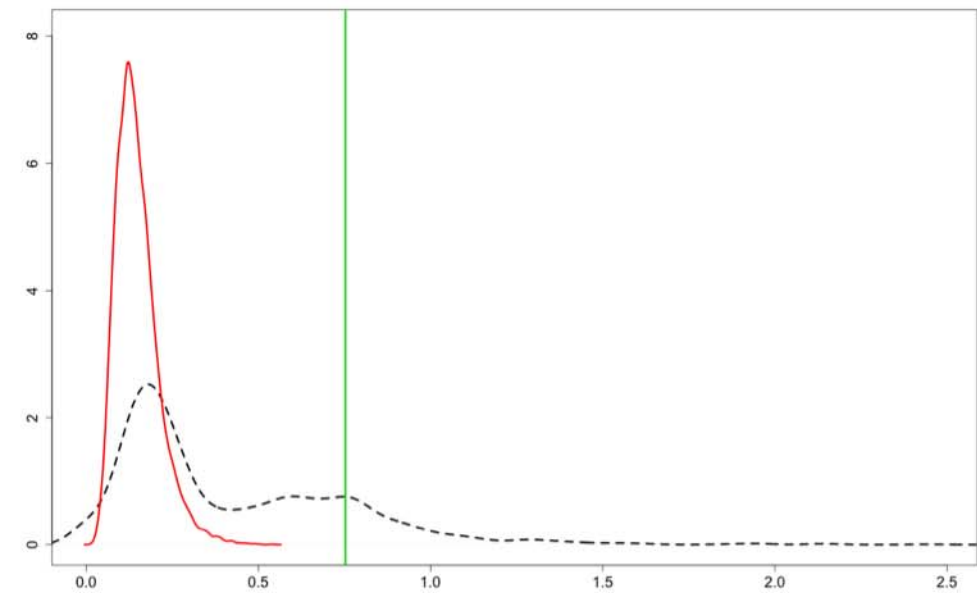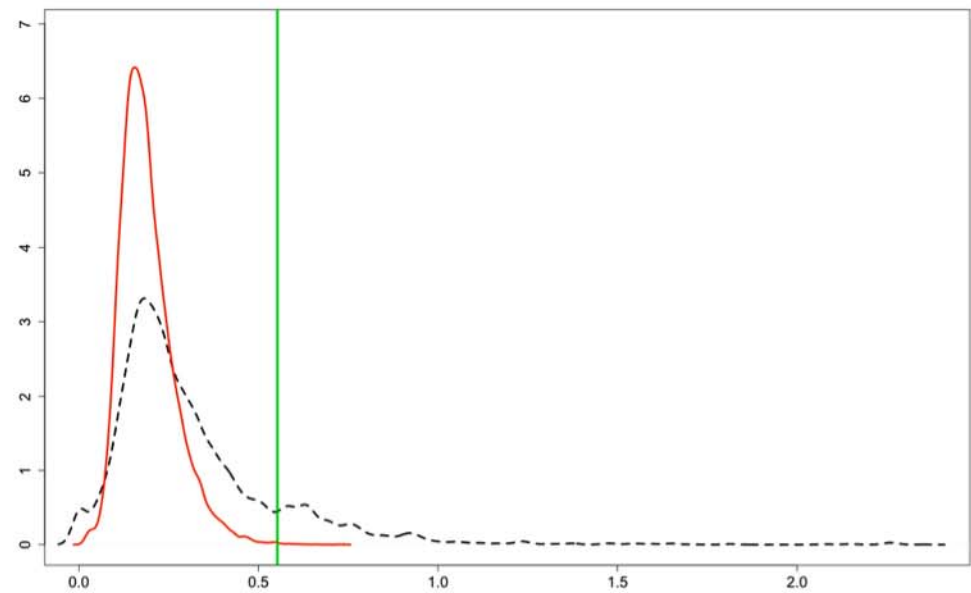

Supplement: 12859_2009_3611_MOESM6_ESM.pdf [file 12859_2009_3611_MOESM6_ESM.pdf]
